# Supplementary material for: Feasibility of Enzymatic Protein Extraction from a Dehydrated Fish Biomass Obtained from Unsorted Canned Yellowfin Tuna Side Streams: Part I
Source: MDPI journal article supplement (doi:10.3390/gels9090760), 2023-09-18
Supplement: s1 [file s1]

**Table S1:** Color parameter of Spray-dried gelatin and Freeze-dried gelatin.

|                                | Spray-dried Gelatin | Freeze-dried Gelatin |
|--------------------------------|---------------------|----------------------|
| <b>CIELab</b>                  | L* = 472.2671       | L* = 371.0127        |
|                                | a* = -1.6761        | a* = 0.2594          |
|                                | b* = 19.3046        | b* = 43.6726         |
| <b>Tristimulus</b>             | X = 7071.2491       | X = 3531.3445        |
|                                | Y = 7457.5894       | Y = 3713.6568        |
|                                | Z = 7574.1517       | Z = 3300.4208        |
| <b>Whiteness</b>               | WI = 7437.5281      | WI = 3656.5520       |
| <b>Tint Index</b>              | T = 7455.8278       | T = 3706.5397        |
| <b>Yellowness ASTM E313-00</b> | YI = 8.0015         | YI = 22.7383         |
| <b>Gardner ASTM D6166</b>      | Gtm = 1.8533        | Gtm = 3.3191         |
| <b>Gardner DIN EN1557</b>      | Gtm = 1.8505        | Gtm = 3.3199         |
