# Supplementary material for: Feasibility of Enzymatic Protein Extraction from a Dehydrated Fish Biomass Obtained from Unsorted Canned Yellowfin Tuna Side Streams: Part I
Source: MDPI journal article supplement (doi:10.3390/gels9090760), 2023-09-18
Supplement: s1 [file s1]

**Table S2:** Color parameter of NCs, ALKs and Oven-dried gelatin.

|                                | NCs            | ALKs          | Gelatin        |
|--------------------------------|----------------|---------------|----------------|
| <b>Tristimulus</b>             | X = 1870.4936  | X = 3208.7604 | X = 2213.4009  |
|                                | Y = 1982.7871  | Y = 3325.9503 | Y = 2322.3236  |
|                                | Z = 1964.3733  | Z = 2553.0068 | Z = 2033.0548  |
| <b>Whiteness</b>               | WI = 1955.6327 | WI= 3230.7691 | WI = 2261.2001 |
| <b>Tint Index</b>              | T = 1981.6514  | T= 3309.6017  | T = 2314.0167  |
| <b>Yellowness ASTM E313-00</b> | YI = 10.1987   | YI= 38.2670   | YI = 24.5286   |
| <b>Gardner ASTM D6166</b>      | Gtm = 2.3176   | Gtm= 4.2726   | Gtm = 3.4203   |
| <b>Gardner DIN EN1557</b>      | Gtm = 2.2618   | Gtm= 4.3417   | Gtm = 3.4353   |
