# Supplementary figures and images for: Feasibility of Enzymatic Protein Extraction from a Dehydrated Fish Biomass Obtained from Unsorted Canned Yellowfin Tuna Side Streams: Part I
Source: MDPI journal article supplement (doi:10.3390/gels9090760), 2023-09-18

**Figure S1:** FTIR Spray-dried and Freeze-dried gelatins.

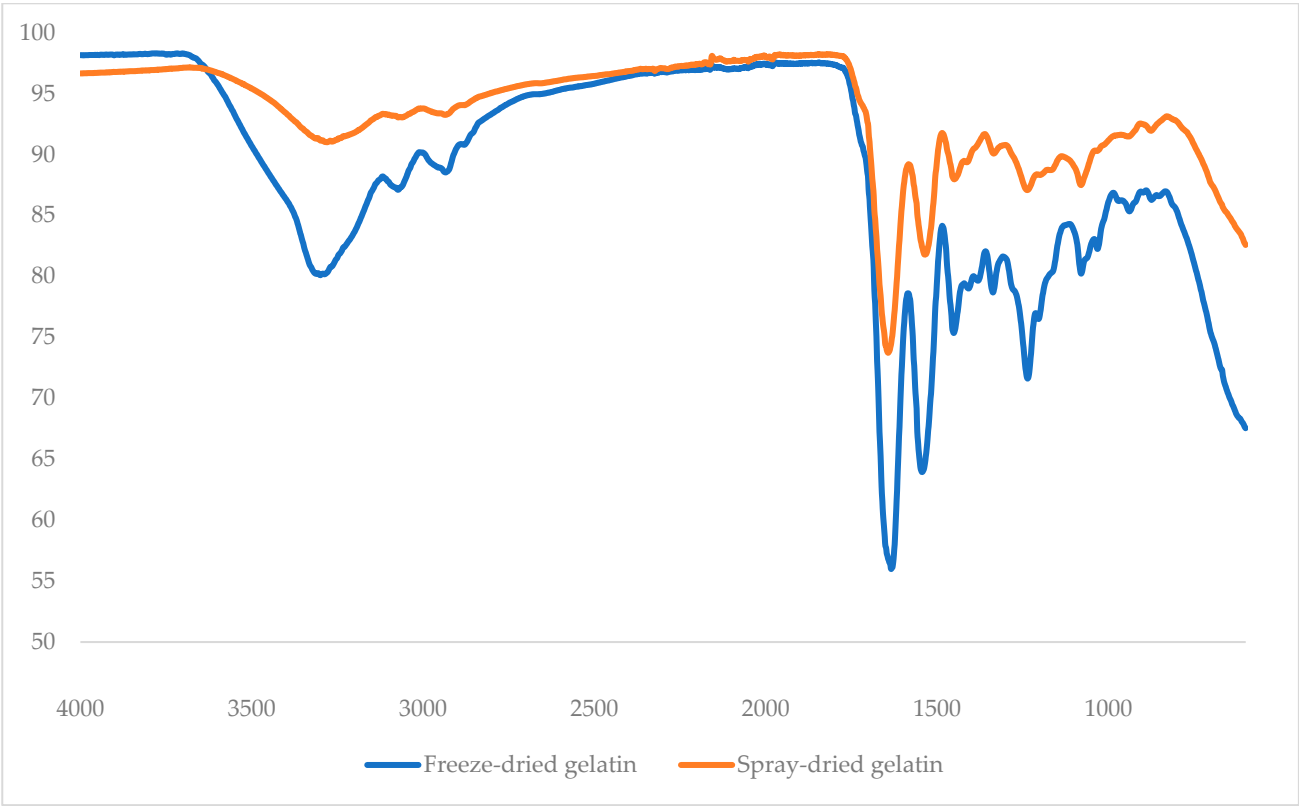

Supplement: s1 [file s1]
